# Supplementary material for: Cobalt-catalysed selective synthesis of aldehydes and alcohols from esters
Source: Royal Society of Chemistry journal article supplement (doi:10.1039/d0cc03076g), 2020-01-01
Supplement: d0cc03076g1.pdf [file d0cc03076g1.pdf]

## SUPPORTING INFORMATION

# **Cobalt-catalysed selective synthesis of aldehydes and alcohols from esters**

Sandip Pattanaik and Chidambaram Gunanathan\*

School of Chemical Sciences, National Institute of Science Education and Research, HBNI, Bhubaneswar-752050, India.

\*Corresponding author. E-mail: [gunanathan@niser.ac.in](mailto:gunanathan@niser.ac.in)

### Index:

|                                                   |     |
|---------------------------------------------------|-----|
| General experimental.....                         | S2  |
| General procedure for synthesis of aldehydes..... | S2  |
| Spectral data of aldehydes.....                   | S2  |
| General procedure for synthesis of alcohols.....  | S4  |
| Spectral data of alcohols.....                    | S4  |
| NMR spectra of aldehydes and alcohols.....        | S6  |
| Proposed mechanism.....                           | S26 |
| References.....                                   | S26 |

**General experimental:** All catalytic reaction were performed under nitrogen atmosphere. All stoichiometric reactions were performed under nitrogen atmosphere MBRAUN glove box. Chemicals were purchased from sigma-Aldrich, across, Alfa-aesar, Himedia chemicals were used without further purification. Catalyst **1** was prepared following our previous report.<sup>1</sup> <sup>1</sup>H and <sup>13</sup>C spectra were recorded on Bruker AV-400 (<sup>1</sup>H NMR: 400 MHz, <sup>13</sup>C NMR: 100.6 MHz) machine. <sup>1</sup>H and <sup>13</sup>C NMR chemical shifts were reported in ppm down field from tetramethylsilane. Multiplicity abbreviated as: s, singlet; d, doublet; t, triplet; q, quartet; sept, septate; m, multiplet; Assignment of <sup>13</sup>C NMR signals was done based on one dimensional(dept-135) NMR technique.

**General procedure for synthesis of aldehydes:** Oven dried scintillation vial containing a stir bar was charged with catalyst **1** (1 mol%), KO<sup>t</sup>Bu (4 mol%), ester (1 mmol), diethylsilane (1.5 mmol) and toluene (1 mL) under nitrogen atmosphere. The closed vial was then placed in a preheated oil bath at 50 °C for 12 h with stirring. After cooling to room temperature, the reaction was quenched with a mixture of THF/HCl(1 N) (2 mL each) and stirred at room temperature for 2 h. Then organic phase was extracted with diethylether and both aqueous phase, organic phase dried under vacuum and further purified by silica gel column chromatography to give the desired product.

#### Spectral data of aldehydes:

**Benzaldehyde (2a):** Colourless liquid. Yield 95, 86, 77 mg (89, 81, 72 %). IR (DCM): <sup>1</sup>H NMR (400 MHz, CDCl<sub>3</sub>):  $\delta$  10.01 (s, 1H), 7.89-7.87 (m, 2H, ArCH), 7.64-7.61 (t, 2H, *J* = 8 Hz, ArCH), 7.54-7.50 (t, 2H, *J* = 8 Hz, ArCH). <sup>13</sup>C{<sup>1</sup>H} NMR (100.6 MHz, CDCl<sub>3</sub>):  $\delta$  192.38 (s), 136.41 (ArCH), 134.45 (ArCH), 129.72 (ArCH), 128.99 (ArCH).



**4-Methyl benzaldehyde (2b):** Colourless liquid. Yield 94 mg (78%). <sup>1</sup>H NMR (400 MHz, CDCl<sub>3</sub>):  $\delta$  9.94 (s, 1H), 7.77-7.75 (m, 2H, ArCH), 7.31-7.30 (m, 2H, ArCH), 2.41 (s, 3H, CH<sub>3</sub>). <sup>13</sup>C{<sup>1</sup>H} NMR (100.6 MHz, CDCl<sub>3</sub>):  $\delta$  192.01 (s), 145.55 (ArCH), 134.19 (ArCH), 129.83 (ArCH), 129.71 (ArCH), 21.82 (CH<sub>3</sub>).



**4-Methoxy benzaldehyde (2c):** Colourless liquid. Yield 124 mg (91%). <sup>1</sup>H NMR (400 MHz, CDCl<sub>3</sub>):  $\delta$  9.87 (s, 1H), 7.83-7.81 (t, 2H, *J* = 8 Hz, ArCH), 7.00-6.98 (t, 2H, *J* = 8 Hz, ArCH), 3.87 (s, 3H, OCH<sub>3</sub>). <sup>13</sup>C{<sup>1</sup>H} NMR (100.6 MHz, CDCl<sub>3</sub>):  $\delta$  190.70 (s), 164.64 (ArCH), 131.92 (ArCH), 130.02 (ArCH), 114.32 (ArCH), 55.53 (OCH<sub>3</sub>).



**4-Cyano benzonitrile (2d):** White solid. Yield 102 mg (78%). <sup>1</sup>H NMR (400 MHz, CDCl<sub>3</sub>):  $\delta$  9.89 (s, 1H), 7.85-7.83 (d, 2H, *J* = 8 Hz, ArCH), 7.01-6.99 (d, 2H, *J* = 8 Hz, ArCH). <sup>13</sup>C{<sup>1</sup>H} NMR (100.6 MHz, CDCl<sub>3</sub>):  $\delta$  191.28 (s), 161.65 (ArCH), 132.54 (ArCH), 129.85 (ArCH), 116.03 (CN).



**4-Hydroxy benzaldehyde (2e):** White solid. Yield 102 mg (83%).  $^1\text{H}$  NMR (400 MHz,  $\text{CDCl}_3$ ):  $\delta$  10.10 (s, 1H), 8.02-8.00 (d, 2H,  $J = 8$  Hz, ArCH), 7.87-7.85 (d, 2H,  $J = 8$  Hz, ArCH).  $^{13}\text{C}$  {1H} NMR (100.6 MHz,  $\text{CDCl}_3$ ):  $\delta$  182.14 (s), 137.12 (ArCH), 134.81 (ArCH), 122.74 (ArCH), 122.72 (ArCH).



**4-Dimethylamino benzaldehyde (2f):** White solid. Yield 58 mg (39%).  $^1\text{H}$  NMR (400 MHz,  $\text{CDCl}_3$ ):  $\delta$  9.75-9.74 (m, 1H), 7.75-7.72 (m, 2H, ArCH), 6.72-6.70 (m, 2H, ArCH), 3.09 (s, 6H,  $\text{N}(\text{CH}_3)_2$ ).  $^{13}\text{C}$  {1H} NMR (100.6 MHz,  $\text{CDCl}_3$ ):  $\delta$  190.24 (s), 154.32 (ArCH), 131.97 (ArCH), 125.56 (ArCH), 111.06 (ArCH), 40.10 ( $\text{N}(\text{CH}_3)_2$ ).



**4-Fluoro benzaldehyde (2g):** Colourless liquid. Yield 91 mg (73%).  $^1\text{H}$  NMR (400 MHz,  $\text{CDCl}_3$ ):  $\delta$  9.93 (s, 1H), 7.90-7.86 (m, 2H, ArCH), 7.20-7.10 (m, 2H, ArCH).  $^{13}\text{C}$  {1H} NMR (100.6 MHz,  $\text{CDCl}_3$ ):  $\delta$  190.53 (s), 167.76 (ArCH), 165.21 (ArCH), 132.93 (ArCH), 132.25-132.16 (ArCH), 116.42-116.20 (ArCH).



**4-Bromo benzaldehyde (2h):** White solid. Yield 94 mg (51%).  $^1\text{H}$  NMR (400 MHz,  $\text{CDCl}_3$ ):  $\delta$  10.00 (s, 1H), 7.78-7.77 (d, 2H,  $J = 4$  Hz, ArCH), 7.72-7.71 (d, 2H,  $J = 4$  Hz, ArCH).  $^{13}\text{C}$  {1H} NMR (100.6 MHz,  $\text{CDCl}_3$ ):  $\delta$  191.11 (s), 135.09 (ArCH), 132.47 (ArCH), 131.00 (ArCH), 129.81 (ArCH).



**2-Phenylacetaldehyde (2i):** Colourless liquid. Yield 97 mg (81%).  $^1\text{H}$  NMR (400 MHz,  $\text{CDCl}_3$ ):  $\delta$  9.77 (s, 1H), 7.44-7.25 (m, 5H, ArCH), 3.72-3.71 (d, 2H,  $J = 4$  Hz,  $\text{CH}_2$ ).  $^{13}\text{C}$  {1H} NMR (100.6 MHz,  $\text{CDCl}_3$ ):  $\delta$  195.51 (s), 131.95 (ArCH), 129.69 (ArCH), 129.05 (ArCH), 127.45 (ArCH), 50.58 ( $\text{CH}_2$ ).



**Cinnamaldehyde (2j):** Yellow liquid. Yield 101 mg (76%).  $^1\text{H}$  NMR (400 MHz,  $\text{CDCl}_3$ ):  $\delta$  9.71-9.69 (d, 1H), 7.57-7.55 (m, 2H, ArCH), 7.49-7.43 (m, 4H, ArCH), 6.74-6.68 (m, 1H, Olefinic CH).  $^{13}\text{C}$  {1H} NMR (100.6 MHz,  $\text{CDCl}_3$ ):  $\delta$  193.68 (s), 152.78 (Olefinic CH), 134.03 (ArCH), 131.29 (ArCH), 191.12 (ArCH), 128.58 (ArCH), 128.52 (Olefinic CH).



**General procedure for synthesis of alcohols:** Oven dried scintillation vial containing a stir bar was charged with catalyst **1** (2 mol %),  $\text{KO}^t\text{Bu}$  (10 mol %), ester (1 mmol), diethylsilane (3 mmol) and toluene (1 mL) under nitrogen atmosphere. The closed vial was then placed in a preheated oil bath at 50 °C for 20 min with stirring. After cooling to room temperature, the

reaction was quenched with a mixture of THF/HCl(1 N) (2 mL each) and stirred at room temperature for 2 h. Then organic phase was extracted with diethylether and both aqueous phase, organic phase dried under vacuum and further purified by silica gel column chromatography using ethylacetate/hexane eluent to give the desired product.

### Spectral data of alcohols:

**Phenylmethanol (3a):** Colourless liquid. Yield 104, 100, 94 mg (96, 92, 87 %). <sup>1</sup>H NMR (400 MHz, CDCl<sub>3</sub>): δ 7.41-7.31 (m, 5H, ArCH), 4.67-4.66 (d, 2H, *J* = 4 Hz, CH<sub>2</sub>), 2.65-2.57 (d, 1H, OH). <sup>13</sup>C{<sup>1</sup>H} NMR (100.6 MHz, CDCl<sub>3</sub>): δ 140.95 (ArCH), 128.59 (ArCH), 127.64 (ArCH), 127.07 (ArCH), 65.18 (CH<sub>2</sub>).



**P-Tolylmethanol (3b):** White solid. Yield 116 mg (95%). <sup>1</sup>H NMR (400 MHz, CDCl<sub>3</sub>): δ 7.28-7.26 (d, 2H, *J* = 8 Hz, ArCH), 7.22-7.20 (d, 2H, *J* = 8 Hz, ArCH), 4.60 (s, 2H, CH<sub>2</sub>), 3.03 (s, 1H, OH), 2.41 (s, 3H, CH<sub>3</sub>). <sup>13</sup>C{<sup>1</sup>H} NMR (100.6 MHz, CDCl<sub>3</sub>): δ 138.05 (ArCH), 137.20 (ArCH), 129.20 (ArCH), 127.17 (ArCH), 64.90 (CH<sub>2</sub>), 21.19 (CH<sub>3</sub>).



**4-(Tert-butyl)phenylmethanol (3c):** Colourless liquid. Yield 100 mg (91%). <sup>1</sup>H NMR (400 MHz, CDCl<sub>3</sub>): δ 7.44-7.42 (d, 2H, *J* = 8 Hz, ArCH), 7.34-7.32 (d, 2H, *J* = 8 Hz, ArCH), 4.66 (s, 2H, CH<sub>2</sub>), 2.65-2.57 (d, 1H, OH). 1.37 (s, 9H, Tertbutyl CH<sub>3</sub>). <sup>13</sup>C{<sup>1</sup>H} NMR (100.6 MHz, CDCl<sub>3</sub>): δ 150.68 (ArCH), 137.97 (ArCH), 126.96 (ArCH), 125.51 (ArCH), 65.05 (CH<sub>2</sub>), 34.59 (quat C), 31.41 (Tertbutyl CH<sub>3</sub>).



**4-(Methoxy)phenylmethanol (3d):** Colourless liquid. Yield 136 mg (98%). IR (DCM): <sup>1</sup>H NMR (400 MHz, CDCl<sub>3</sub>): δ 7.28-7.26 (d, 2H, *J* = 8 Hz, ArCH), 6.90-6.98 (d, 2H, *J* = 8 Hz, ArCH), 4.57 (s, 2H, CH<sub>2</sub>), 3.81 (s, 3H, OCH<sub>3</sub>), 2.47 (s, 1H, OH). <sup>13</sup>C{<sup>1</sup>H} NMR (100.6 MHz, CDCl<sub>3</sub>): δ 159.12 (ArCH), 133.22 (ArCH), 128.64 (ArCH), 113.92 (ArCH), 64.79 (CH<sub>2</sub>), 55.29 (OCH<sub>3</sub>).



**4-(Fluoro)phenylmethanol (3e):** Colourless liquid. Yield 111 mg (88%). <sup>1</sup>H NMR (400 MHz, CDCl<sub>3</sub>): δ 7.26-7.24 (m, 2H, ArCH), 7.03-6.99 (m, 2H, ArCH), 4.54-4.52 (m, 2H, CH<sub>2</sub>), 3.69-3.52 (m, 1H, OH). <sup>13</sup>C{<sup>1</sup>H} NMR (100.6 MHz, CDCl<sub>3</sub>): δ 163.46 (ArCH), 161.02 (ArCH), 136.61-136.59 (ArCH), 128.77-128.69 (ArCH), 115.36-115.15 (ArCH), 64.10 (CH<sub>2</sub>).



**2-Phenylethan-1-ol (3f):** Colourless liquid. Yield 114 mg (93%). <sup>1</sup>H NMR (400 MHz, CDCl<sub>3</sub>): δ 7.38-7.35 (m, 2H, ArCH), 7.30-7.27 (t, 3H, *J* = 8 Hz, ArCH), 3.87-3.84 (t, 2H, *J* = 8 Hz, CH<sub>2</sub>), 2.91-2.88 (t, 2H, *J* = 8 Hz, CH<sub>2</sub>). <sup>13</sup>C{<sup>1</sup>H} NMR (100.6 MHz, CDCl<sub>3</sub>): δ 138.63 (ArCH), 129.05 (ArCH), 128.53 (ArCH), 126.41 (ArCH), 63.55 (CH<sub>2</sub>), 29.15 (CH<sub>2</sub>).



**3-Phenylpropan-1-ol (3g):** Colourless liquid. Yield 122 mg (89%). <sup>1</sup>H NMR (400 MHz, CDCl<sub>3</sub>): δ 7.37-7.27 (m, 5H, ArCH), 3.73-3.69 (m, 2H, CH<sub>2</sub>), 2.79-2.75 (m, 2H, CH<sub>2</sub>), 1.99-



1.94 (m, 2H,  $CH_2$ ).  $^{13}C\{^1H\}$  NMR (100.6 MHz,  $CDCl_3$ ):  $\delta$  141.09 (ArCH), 128.52 (ArCH), 148.47 (ArCH), 125.92 (ArCH), 62.05 ( $CH_2$ ). 34.25 ( $CH_2$ ), 32.16 ( $CH_2$ ).

**Hexan-1-ol (3h):** Colourless liquid. Yield 88 mg (86%).  $^1H$  NMR (400 MHz,  $CDCl_3$ ): 3.67-3.60 (m, 2H,  $CH_2$ ), 2.05-1.92 (m, 2H,  $CH_2$ ), 1.31 (s, 6H,  $CH_2$ ), 0.94-0.89 (m, 3H,  $CH_3$ ).  $^{13}C\{^1H\}$  NMR (100.6 MHz,  $CDCl_3$ ): 62.94 ( $CH_2$ ). 32.72 ( $CH_2$ ), 31.63 ( $CH_2$ ), 25.42 ( $CH_2$ ). 22.61 ( $CH_2$ ), 13.99 ( $CH_3$ ).

**Heptan-1-ol (3i):** Colourless liquid. Yield 98 mg (84%).  $^1H$  NMR (400 MHz,  $CDCl_3$ ): 3.62-3.59 (m, 2H,  $CH_2$ ), 2.31 (s, 1H, OH), 1.57-1.53 (t, 3H,  $J = 8$  Hz,  $CH_2$ ), 1.30-1.28 (m, 8H,  $CH_2$ ), 0.89-0.86 (m, 3H,  $CH_3$ ).  $^{13}C\{^1H\}$  NMR (100.6 MHz,  $CDCl_3$ ): 62.84 ( $CH_2$ ). 32.73 ( $CH_2$ ), 31.82 ( $CH_2$ ), 29.10 ( $CH_2$ ), 25.71 ( $CH_2$ ), 22.57 ( $CH_2$ ), 14.02 ( $CH_3$ ).

**Hexane-1,6-diol (3j):** White solid. Yield 102 mg (86%).  $^1H$  NMR (400 MHz,  $CDCl_3$ ): 3.65-3.62 (m, 4H,  $J = 4$  Hz,  $CH_2$ ), 2.12 (s, 2H, OH), 1.60-1.57 (t, 4H,  $J = 4$  Hz,  $CH_2$ ), 1.42-1.38 (m, 4H,  $CH_2$ ).  $^{13}C\{^1H\}$  NMR (100.6 MHz,  $CDCl_3$ ): 62.74 ( $CH_2$ ). 32.62 ( $CH_2$ ), 25.49 ( $CH_2$ ).

## NMR spectra of aldehydes and alcohols

### $^1\text{H}$ NMR spectrum of benzaldehyde ( 400 MHz, $\text{CDCl}_3$ )



### $^{13}\text{C}$ NMR spectrum of benzaldehyde ( 400 MHz, $\text{CDCl}_3$ )



$^1\text{H}$  NMR spectrum of 4-methyl benzaldehyde ( 400 MHZ,  $\text{CDCl}_3$ )



$^{13}\text{C}$  NMR spectrum of 4-methyl benzaldehyde ( 400 MHZ,  $\text{CDCl}_3$ )



$^1\text{H}$  NMR spectrum of 4-methoxybenzaldehyde ( 400 MHz,  $\text{CDCl}_3$  )



13

$^{13}\text{C}$  NMR spectrum of 4-methoxybenzaldehyde ( 400 MHz,  $\text{CDCl}_3$  )



$^1\text{H}$  NMR spectrum of 4-hydroxybenzaldehyde ( 400 MHz,  $\text{CDCl}_3$  )



$^{13}\text{C}$  NMR spectrum of 4-hydroxybenzaldehyde ( 400 MHz,  $\text{CDCl}_3$  )



$^1\text{H}$  NMR spectrum of 4-formyl benzonitrile ( 400 MHz,  $\text{CDCl}_3$  )



13

C NMR spectrum of 4-formyl benzonitrile ( 400 MHz,  $\text{CDCl}_3$  )



$^1\text{H}$  NMR spectrum of 4-dimethylamino benzaldehyde ( 400 MHZ,  $\text{CDCl}_3$  )



$^{13}\text{C}$  NMR spectrum of 4-dimethylamino benzaldehyde ( 400 MHZ,  $\text{CDCl}_3$  )



$^1\text{H}$  NMR spectrum of 4-fluorobenzaldehyde ( 400 MHZ,  $\text{CDCl}_3$  )



$^{13}\text{C}$  NMR spectrum of 4-fluorobenzaldehyde ( 400 MHZ,  $\text{CDCl}_3$  )



$^1\text{H}$  NMR spectrum of 4-bromo benzaldehyde ( 400 MHz,  $\text{CDCl}_3$  )



$^{13}\text{C}$  NMR spectrum of 4-bromo benzaldehyde ( 400 MHz,  $\text{CDCl}_3$  )



$^1\text{H}$  NMR spectrum of 2-phenylacetaldehyde ( 400 MHZ,  $\text{CDCl}_3$  )



$^{13}\text{C}$  NMR spectrum of 2-phenylacetaldehyde ( 400 MHZ,  $\text{CDCl}_3$  )



$^1\text{H}$  NMR spectrum of cinnamaldehyde ( 400 MHz,  $\text{CDCl}_3$  )



$^{13}\text{C}$  NMR spectrum of cinnamaldehyde ( 400 MHz,  $\text{CDCl}_3$  )



$^1\text{H}$  NMR spectrum of benzyl alcohol ( 400 MHZ,  $\text{CDCl}_3$  )



$^{13}\text{C}$  NMR spectrum of benzyl alcohol ( 400 MHZ,  $\text{CDCl}_3$  )



$^1\text{H}$  NMR spectrum of p-tolylmethanol ( 400 MHz,  $\text{CDCl}_3$ )



$^{13}\text{C}$  NMR spectrum of p-tolylmethanol ( 400 MHz,  $\text{CDCl}_3$ )



$^1\text{H}$  NMR spectrum of 4-(tert-butyl)phenylmethanol ( 400 MHZ,  $\text{CDCl}_3$ )



$^{13}\text{C}$  NMR spectrum of 4-(tert-butyl)phenylmethanol ( 400 MHZ,  $\text{CDCl}_3$ )



$^1\text{H}$  NMR spectrum of 4-(methoxy)phenylmethanol ( 400 MHz,  $\text{CDCl}_3$  )



$^{13}\text{C}$  NMR spectrum of 4-(methoxy)phenylmethanol ( 400 MHz,  $\text{CDCl}_3$  )



$^1\text{H}$  NMR spectrum of 4-(fluoro)phenylmethanol ( 400 MHz,  $\text{CDCl}_3$  )



$^{13}\text{C}$  NMR spectrum of 4-(fluoro)phenylmethanol ( 400 MHz,  $\text{CDCl}_3$  )



$^1\text{H}$  NMR spectrum of 2-phenylethan-1-ol ( 400 MHz,  $\text{CDCl}_3$  )



$^{13}\text{C}$  NMR spectrum of 2-phenylethan-1-ol ( 400 MHz,  $\text{CDCl}_3$  )



$^1\text{H}$  NMR spectrum of 3-phenylpropan-1-ol ( 400 MHz,  $\text{CDCl}_3$  )



$^{13}\text{C}$  NMR spectrum of 3-phenylpropan-1-ol ( 400 MHz,  $\text{CDCl}_3$  )



<sup>1</sup>H NMR spectrum of hexan-1-ol ( 400 MHZ, CDCl<sub>3</sub>)



<sup>13</sup>C NMR spectrum of hexan-1-ol ( 400 MHZ, CDCl<sub>3</sub>)



$^1\text{H}$  NMR spectrum of heptan-1-ol ( 400 MHz,  $\text{CDCl}_3$  )



$^{13}\text{C}$  NMR spectrum of heptan-1-ol ( 400 MHz,  $\text{CDCl}_3$  )



$^1\text{H}$  NMR spectrum of hexane-1,6-diol ( 400 MHz,  $\text{CDCl}_3$ )



$^{13}\text{C}$  NMR spectrum of hexane-1,6-diol ( 400 MHz,  $\text{CDCl}_3$ )



### Proposed mechanism:

Although more studies are required, a possible mechanism for the selective reduction of esters to aldehydes and alcohols is proposed in Scheme S1. The reaction of catalyst **1** with base provides the coordinatively unsaturated intermediate **I** as established previously.<sup>1</sup> Reaction of intermediate **I** with diethylsilane can generate a complex **II** as a result of Si-H bond activation, facilitated by amine-amide metal-ligand cooperation.<sup>2</sup> Further reaction of **II** with ester may lead to hydrosilylation and formation of coordination complex **III**. The transformation of intermediate **II** to **III** may involve the formation of Co-H intermediate and multistep pathway. Dissociation of silylacetal intermediate should then regenerate the active species **I**. In the presence of excess of silane, the intermediate **III** may rearrange to cobalt silylacetal complex **IV**, which upon reaction with diethylsilane provides the silyl ether products and regenerates the intermediate **I**. Acidic work up of the reaction mixture containing either silylacetal or silyl ether intermediates selectively produce aldehydes and alcohols, respectively.



**Scheme S1** Proposed mechanism for cobalt catalyzed synthesis of aldehydes and alcohols from esters

### References:

- (1) (a) S. Pattanaik and C. Gunanathan, *ACS Catal.* 2019, **9**, 5552-5561. (b) D. R. Pradhan, S. Pattanaik, J. Kishore and C. Gunanathan, *Org. Lett.* 2020, **22**, 1852-1857.
- (2) Reviews on metal-ligand cooperation: (a) J. R. Khusnutdinova, and D. Milstein, *Angew. Chem., Int. Ed.* 2015, **54**, 12236-12273. (b) C. Gunanathan and D. Milstein, *Acc. Chem. Res.* **2011**, **44**, 588-602
